# Supplementary material for: Sensitive sensors for amperometric detection of nitrite based on carbon-supported PdNi and PdCo bimetallic nanoparticles
Source: Royal Society of Chemistry journal article supplement (doi:10.1039/c4ay01461h), 2014-01-01
Supplement: c4ay01461h1.pdf [file c4ay01461h1.pdf]

## Supplementary data

### Highly sensitive sensors for amperometric detection of nitrite based on carbon-supported PdNi and PdCo bimetallic nanoparticles

Qianjie Xie<sup>b</sup>, Wenya He<sup>b</sup>, Sha Yu<sup>b</sup>, Xiang-Yu Chen<sup>b</sup>, Xin Zhang<sup>a,\*</sup> and Yehua Shen<sup>b,\*</sup>

<sup>a</sup> Shaanxi Provincial Key Laboratory of Electroanalytical Chemistry, Institute of Analytical Science, Northwest University, Xi ' an, Shaanxi 710069, China

<sup>b</sup> Key Laboratory of Synthetic and Natural Functional Molecule Chemistry (Ministry of Education), College of Chemistry and Material Science, Northwest University, Xi'an 710069, PR China

---

#### Corresponding Author

\* E-mail: zhangxin@nwu.edu.cn (X. Zhang). yhshen@nwu.edu.cn (Y. Shen).

Fax/ Tel: +86 29 88303448, +86 29 88302604.

**Fig. S1**

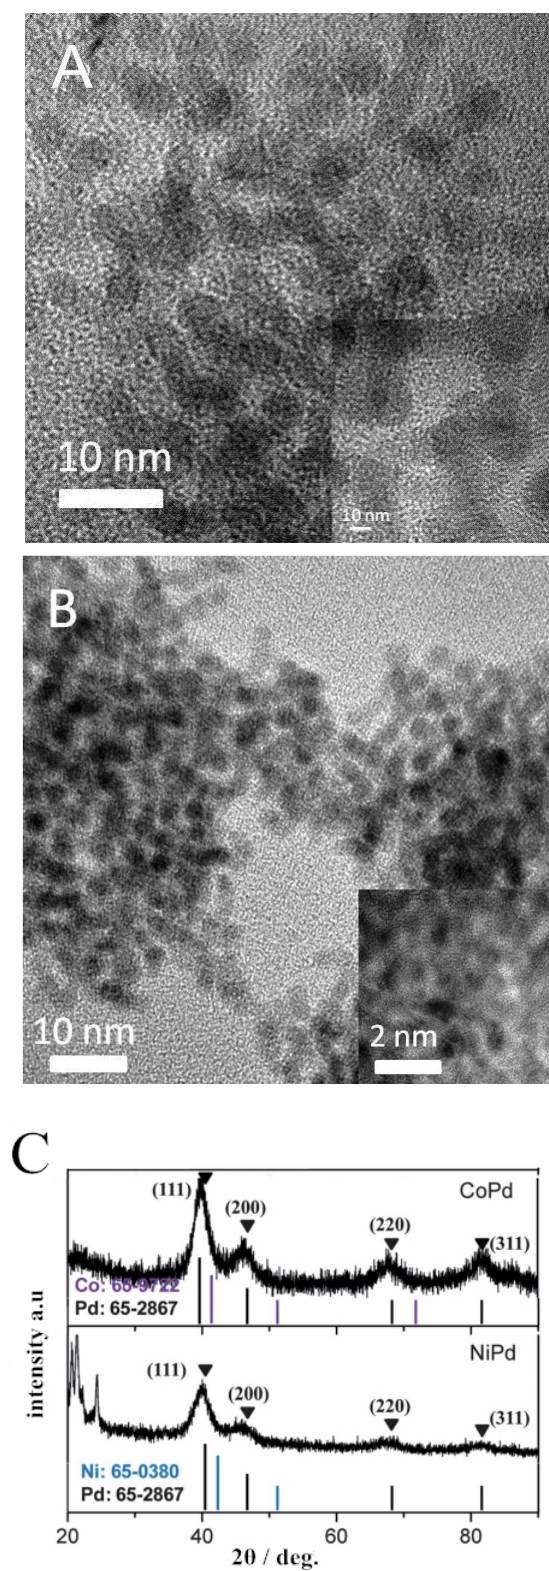

**Fig. S1.** (A) HR-TEM image of NiPd nanocrystals. (B) HR-TEM image of CoPd nanocrystals. (C) XRD patterns of as-synthesized CoPd and NiPd nanocrystals.

**Fig. S2**

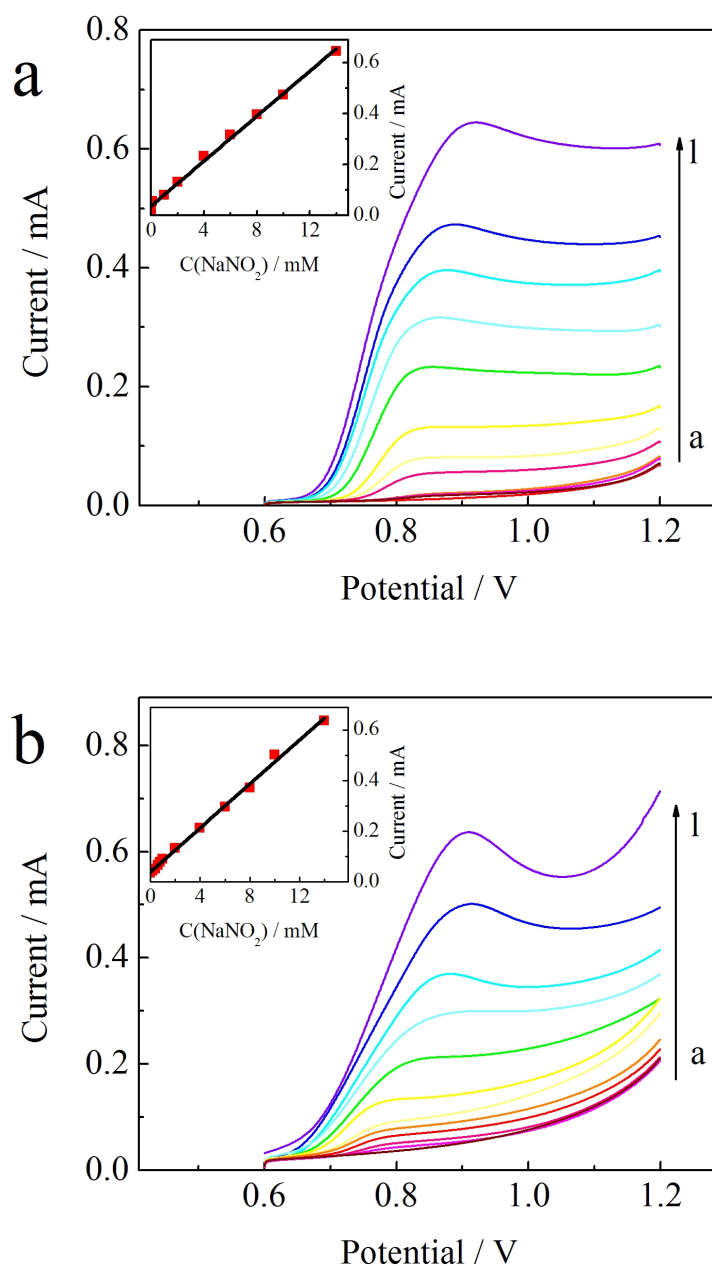

**Fig. S2.** Linear sweep voltammetry of PdNi/C (a) and PdCo/C (b) modified GCEs in 0.1 M PBS (pH=7.0) solution at different concentrations of nitrite: (a) 0.0, (b) 0.001, (c) 0.01, (d) 0.1, (e) 0.5, (f) 1, (g) 2, (h) 4, (i) 6, (j) 8, (k) 10, and (l) 14 mM; scan rate:  $50 \text{ mV s}^{-1}$ . Inset shows the calibration curve

**Fig. S3**

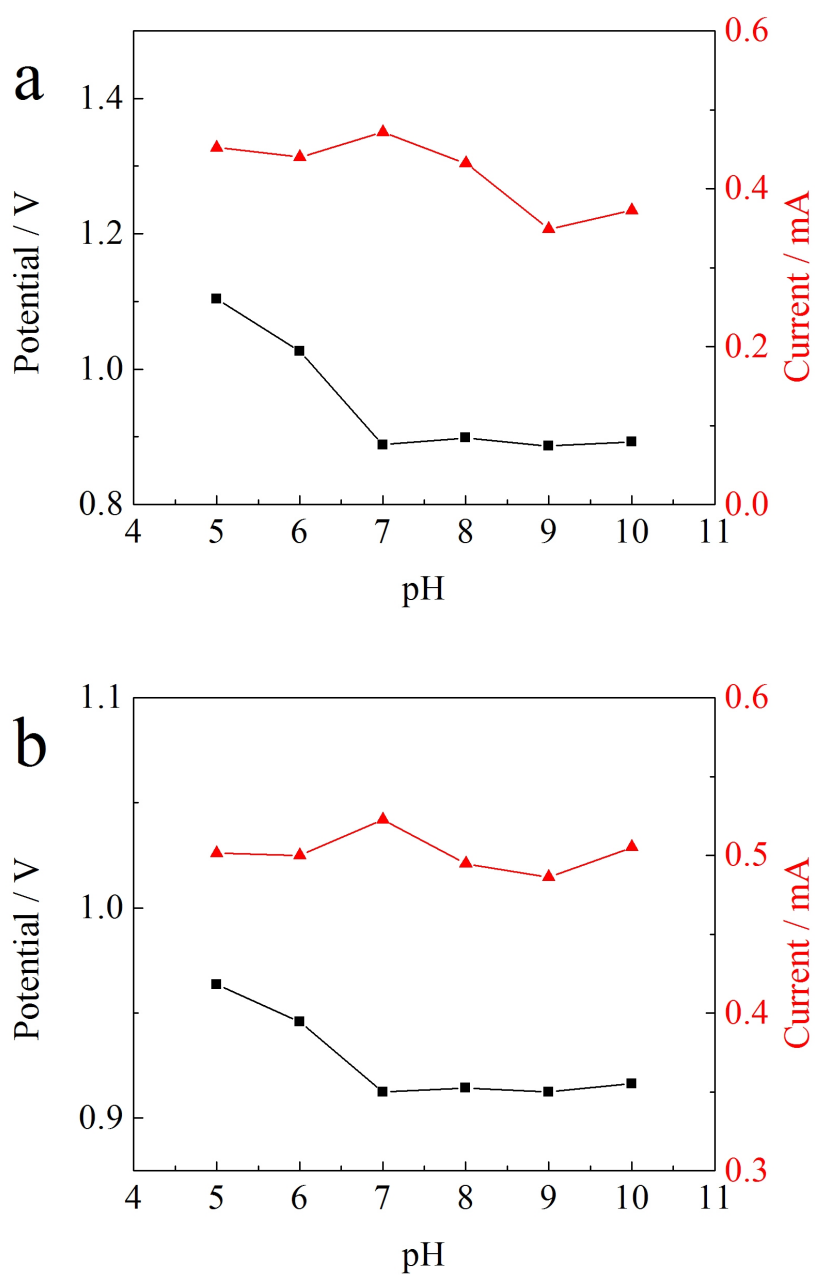

**Fig. S3.** The dependence of the oxidation peak potential and oxidation peak current on pH at PdNi/C (a) and PdCo/C (b) modified GCEs. Scan rate:  $20 \text{ mV s}^{-1}$ ;  $C_{\text{NaNO}_2} = 10 \text{ mM}$ .
